# Supplementary material for: The side chain template effect in viologen on the formation of polypseudorotaxane architecture: six novel metal coordination polymers and their properties
Source: Royal Society of Chemistry journal article supplement (doi:10.1039/c3ce40276b), 2013-01-01
Supplement: c3ce40276b.pdf [file c3ce40276b.pdf]

Supplementary material for

**The side chain template effect in viologen on the formation of  
polypseudorotaxane architecture: six novel metal coordination  
polymers and their properties**

Li Li,<sup>a</sup> Jun-Ming Yue,<sup>a</sup> Yong-Zhen Qiao,<sup>a</sup> Yun-Yin Niu,<sup>a,b</sup> and Hong-Wei Hou<sup>a</sup>

<sup>a</sup>College of Chemistry and Molecular Engineering, Zhengzhou University, Zhengzhou 450001, P. R. China. Email: niuyy@zzu.edu.cn

<sup>b</sup>State Key Lab of Coordination Chemistry, Nanjing University, Nanjing 210093, P. R. China.

**Table S1.** Selected bond distances (Å) and angles (°) for compounds **1-3**

| Compound 1          |          |                     |          |                   |           |
|---------------------|----------|---------------------|----------|-------------------|-----------|
| Cu(1)-N(2)          | 1.928(4) | Cu(1)-N(1)#1        | 1.931(4) | Cu(1)-S(1)        | 2.409(1)  |
| Cu(1)-S(2)#2        | 2.530(2) | N(1)-Cu(1)#3        | 1.931(4) | S(2)-Cu(1)#2      | 2.530(2)  |
| N(2)-Cu(1)-N(1)#1   | 131.3(2) | N(2)-Cu(1)-S(1)     | 112.0(1) | N(1)#1-Cu(1)-S(1) | 100.0(1)  |
| N(2)-Cu(1)-S(2)#2   | 103.2(1) | N(1)#1-Cu(1)-S(2)#2 | 101.5(1) | S(1)-Cu(1)-S(2)#2 | 106.48(6) |
| C(7)-N(1)-Cu(1)#3   | 165.5(4) | C(8)-N(2)-Cu(1)     | 161.9(4) | C(7)-S(1)-Cu(1)   | 100.1(2)  |
| C(8)-S(2)-Cu(1)#2   | 95.4(2)  |                     |          |                   |           |
| Compound 2          |          |                     |          |                   |           |
| Cu(1)-N(1)#1        | 1.976(4) | Cu(1)-N(2)#2        | 1.977(4) | Cu(1)-S(2)        | 2.398(1)  |
| Cu(1)-S(1)          | 2.401(1) | N(1)-Cu(1)#2        | 1.976(4) | N(2)-Cu(1)#1      | 1.977(4)  |
| N(1)#1-Cu(1)-N(2)#2 | 116.3(2) | N(1)#1-Cu(1)-S(2)   | 102.1(1) | N(2)#2-Cu(1)-S(2) | 118.5(1)  |
| N(1)#1-Cu(1)-S(1)   | 109.0(1) | N(2)#2-Cu(1)-S(1)   | 102.1(1) | S(2)-Cu(1)-S(1)   | 108.63(5) |
| C(1)-S(1)-Cu(1)     | 98.6(2)  | C(2)-S(2)-Cu(1)     | 98.7(1)  | C(1)-N(1)-Cu(1)#2 | 158.8(3)  |
| C(2)-N(2)-Cu(1)#1   | 158.7(3) |                     |          |                   |           |
| Compound 3          |          |                     |          |                   |           |
| Cu(1)-N(1)#1        | 1.976(4) | Cu(1)-N(2)#2        | 1.977(4) | Cu(1)-S(2)        | 2.398(1)  |
| Cu(1)-S(1)          | 2.401(1) | N(1)-Cu(1)#2        | 1.976(4) | N(2)-Cu(1)#1      | 1.977(4)  |
| N(1)#1-Cu(1)-N(2)#2 | 116.3(2) | N(1)#1-Cu(1)-S(2)   | 102.1(1) | N(2)#2-Cu(1)-S(2) | 118.5(1)  |

|                           |           |                                      |           |                           |           |
|---------------------------|-----------|--------------------------------------|-----------|---------------------------|-----------|
| N(1)#1-Cu(1)-S(1)         | 109.0(1)  | N(2)#2-Cu(1)-S(1)                    | 102.1(1)  | S(2)-Cu(1)-S(1)           | 108.63(5) |
| C(1)-S(1)-Cu(1)           | 98.6(2)   | C(2)-S(2)-Cu(1)                      | 98.7(1)   | C(1)-N(1)-Cu(1)#2         | 158.8(3)  |
| C(2)-N(2)-Cu(1)#1         | 158.7(3)  |                                      |           |                           |           |
| Compound 4                |           |                                      |           |                           |           |
| Cu1- S1                   | 2.407(1)  | Cu1- S2                              | 2.498(1)  | Cu1- N1 <sup>1</sup>      | 1.977(3)  |
| Cu1- N4                   | 2.034(3)  | Cu2- S1                              | 2.659(1)  | Cu2- S2                   | 2.451(1)  |
| Cu2- N2 <sup>2</sup>      | 1.934(4)  | Cu2- N3                              | 1.938(4)  | N1- Cu1 <sup>3</sup>      | 1.977(3)  |
| N2- Cu2 <sup>2</sup>      | 1.934(4)  | S1- Cu1- S2                          | 98.52(4)  | N1 <sup>1</sup> - Cu1- S1 | 119.5(1)  |
| N1 <sup>1</sup> - Cu1- S2 | 99.3(1)   | N1 <sup>1</sup> - Cu1- N4            | 117.0(1)  | N4- Cu1- S1               | 111.7(1)  |
| N4- Cu1- S2               | 107.2(1)  | S1- Cu1- S2                          | 93.27(4)  | N2 <sup>2</sup> -Cu2- S1  | 106.9(1)  |
| N2 <sup>2</sup> -Cu2- S2  | 102.8(1)  | N2 <sup>2</sup> -Cu2- N3             | 128.1(2)  | N3- Cu2- S1               | 105.1(1)  |
| N3- Cu2- S2               | 115.1(1)  | Cu1- S1-Cu2                          | 80.07(4)  | C1- S1- Cu1               | 112.5(1)  |
| C1- S1- Cu2               | 100.5(1)  | Cu2- S2- Cu1                         | 82.54(4)  | C2- S2- Cu1               | 97.7(2)   |
| C2- S2- Cu2               | 99.5(1)   | C1- N1- Cu1 <sup>3</sup>             | 170.9(3)  | C2- N2- Cu2 <sup>2</sup>  | 157.7(3)  |
| C3- N3- Cu2               | 164.6(4)  | C4- N4- Cu1                          | 121.8(3)  | C8- N4- Cu1               | 122.2(3)  |
| Compound 5                |           |                                      |           |                           |           |
| Cu(1)-N(2)                | 1.912(2)  | Cu(1)-N(1)                           | 1.918(2)  | Cu(1)-S(2)                | 2.3742(9) |
| Cu(1)-S(1)                | 2.800(1)  |                                      |           |                           |           |
| N(2)-Cu(1)-N(1)           | 136.1(1)  | N(2)-Cu(1)-S(2)                      | 110.78(8) | N(1)-Cu(1)-S(2)           | 105.63(8) |
| N(2)-Cu(1)-S(1)           | 98.80(8)  | N(1)-Cu(1)-S(1)                      | 95.65(9)  | S(2)-Cu(1)-S(1)           | 103.61(3) |
| C(2)#1-N(1)-Cu(1)         | 166.7(3)  | C(1)-N(2)-Cu(1)                      | 166.2(2)  | C(1)#2-S(1)-Cu(1)         | 95.1(1)   |
| C(2)-S(2)-Cu(1)           | 101.4(1)  |                                      |           |                           |           |
| Compound 6                |           |                                      |           |                           |           |
| Cu1-S1                    | 2.421(2)  | Cu1-S2                               | 2.383(2)  | Cu1-N2 <sup>1</sup>       | 2.004(5)  |
| Cu1-N3 <sup>2</sup>       | 1.995(5)  | N2-Cu1 <sup>2</sup>                  | 2.004(5)  | N3-Cu1 <sup>1</sup>       | 1.995(5)  |
| S2-Cu1-S1                 | 107.89(6) | N2 <sup>1</sup> -Cu1-S1              | 115.5(2)  | N2 <sup>1</sup> -Cu1-S2   | 103.3(1)  |
| N3 <sup>2</sup> -Cu1-S2   | 115.4(2)  | N3 <sup>2</sup> -Cu1-N2 <sup>1</sup> | 113.7(2)  | C11-S1-Cu1                | 99.0(2)   |
| C12-S2-Cu1                | 97.3(2)   | C11-N2-Cu1 <sup>2</sup>              | 156.5(5)  | C12-N3-Cu1 <sup>1</sup>   | 157.1(4)  |

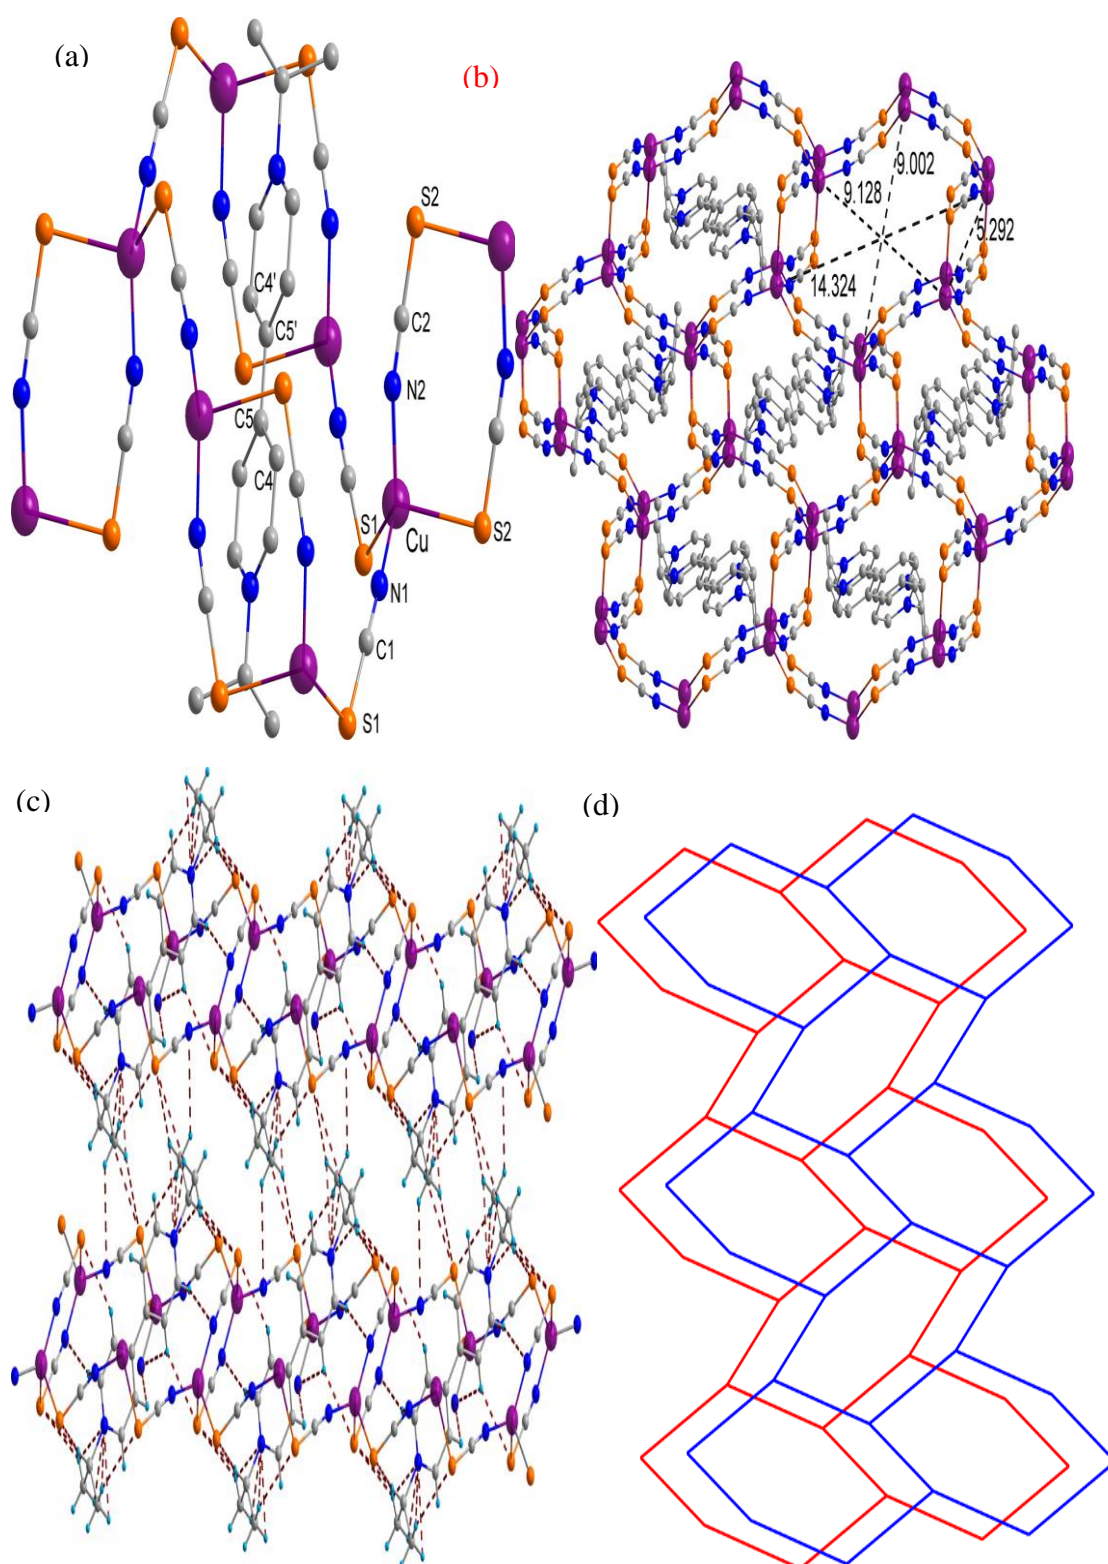

**Fig. S1** (a) The structure unit diagram of **3** (#1  $-x+2,-y+2,-z$  #2  $x,-y+3/2,z+1/2$  #3  $x,-y+3/2,z-1/2$  #4  $-x,-y+2,-z+1$ ). (The H atoms were omitted for clarity) (b) Structure showing the accumulation in space of **3** viewed along *a*-direction. (c) The diagram of weak interactions in complex **3**. (d) The topology of compound **3**. (Distinct colour shows different layer)

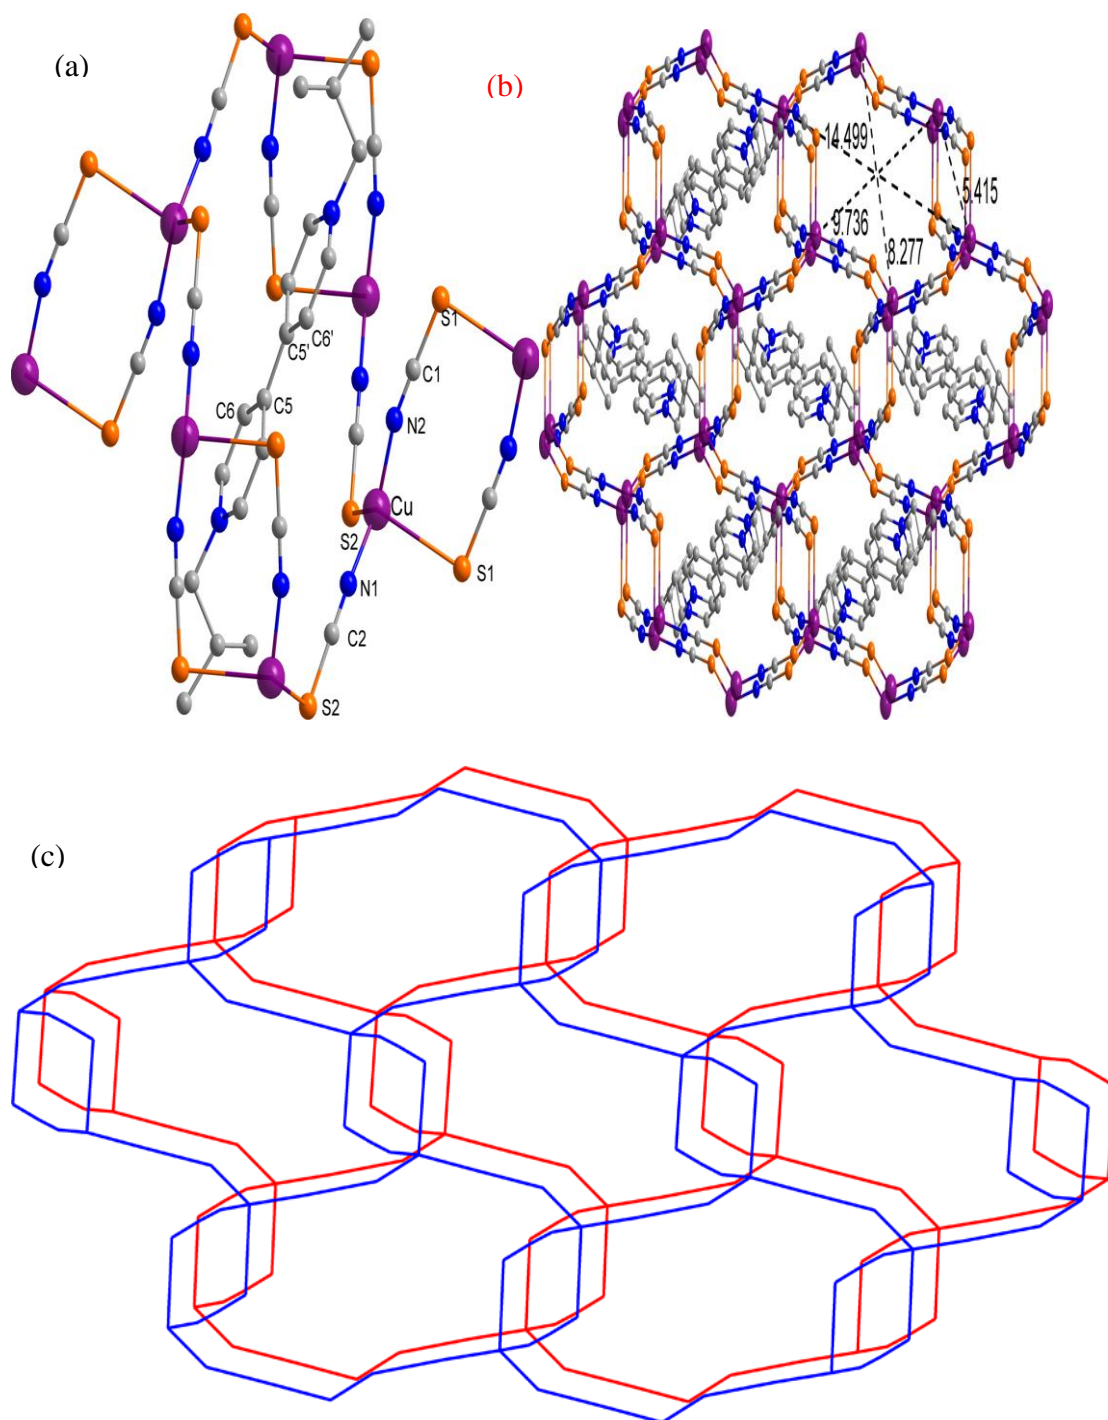

**Fig. S2** (a) The structure unit diagram of **5** (#1  $x, -y+3/2, z-1/2$  #2  $-x+1, -y+2, -z+2$  #3  $x, -y+3/2, z+1/2$  #4  $-x+1, -y+1, -z+2$ ). (The H atoms were omitted for clarity) (b) Structure showing the accumulation in space of **5** viewed along *a*-direction. (c) The topology of compound **3** (distinct colour shows different layer).



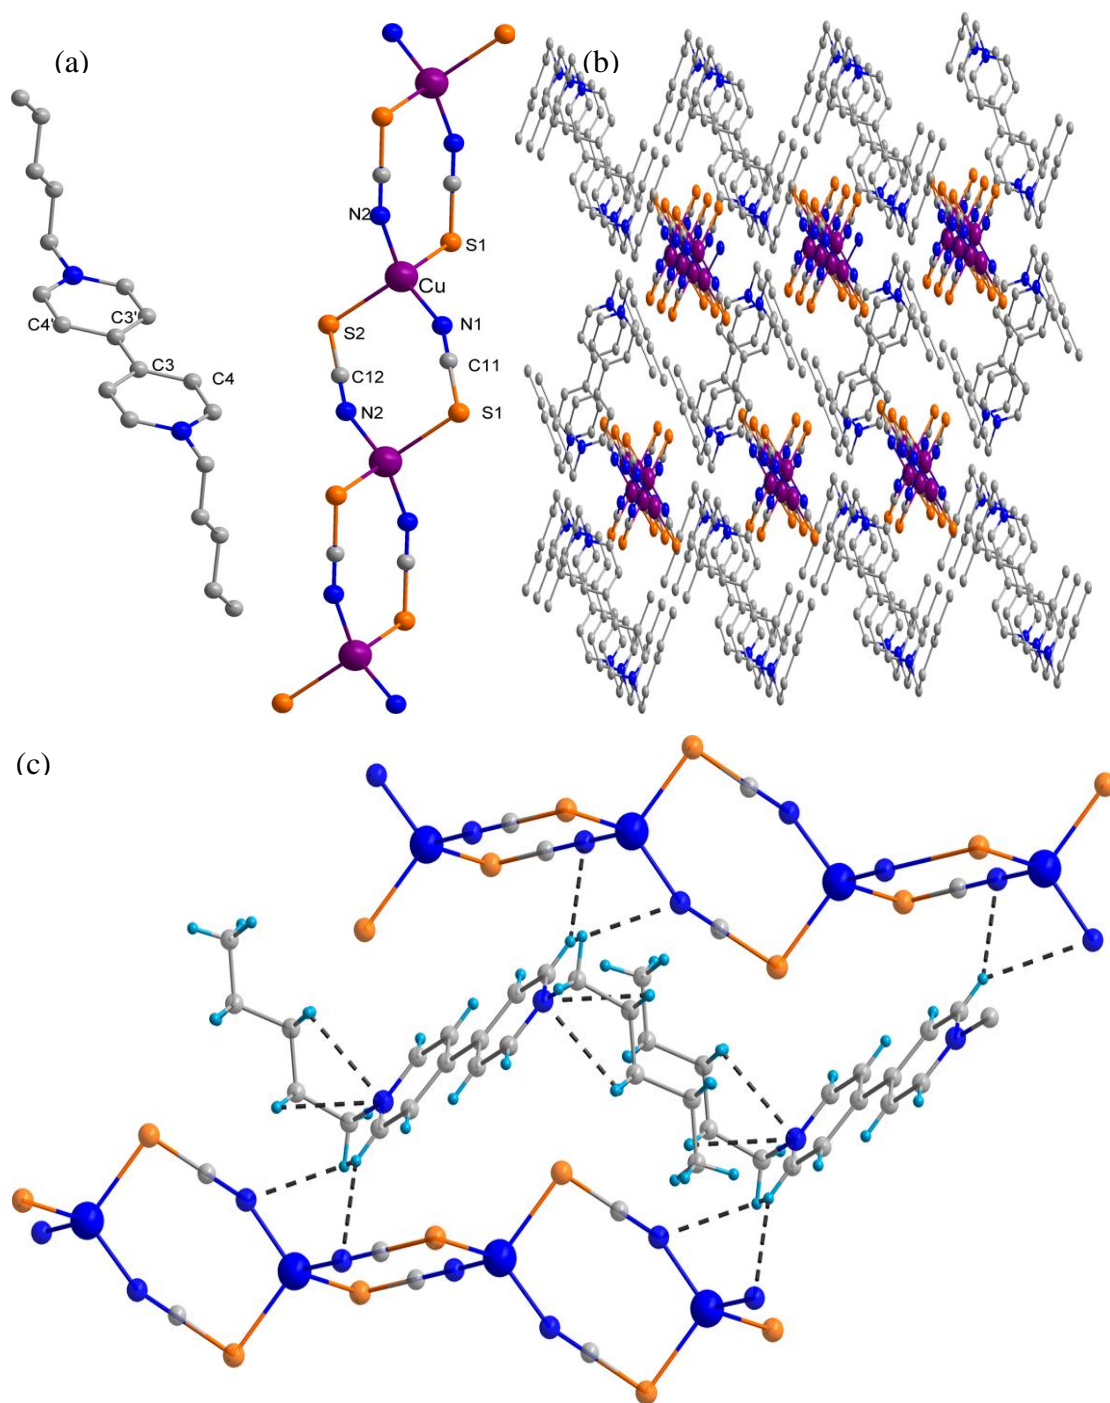

**Fig. S3** (a) The structural diagram of **6** ( $^1+X,1/2-Y,-1/2+Z$ ;  $^2+X,1/2-Y,1/2+Z$ ;  $^31-X,1-Y,1-Z$ ). (The H atoms were omitted for clarity) (b) Structure showing the unit-cell packing and one-dimensional chain of **6** viewed along *a*-direction. (c) The diagram of weak interactions in complex **6**.

**Fig. S4**

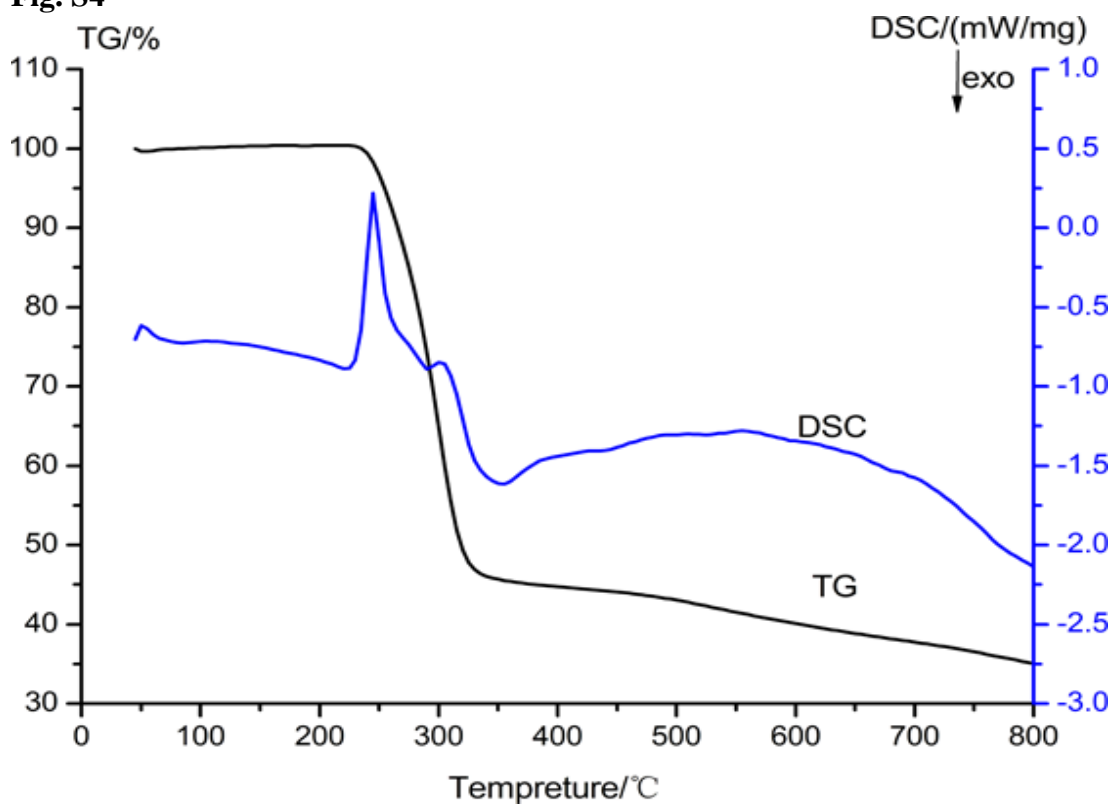

(a) The TG-DSC curves of compound **1**

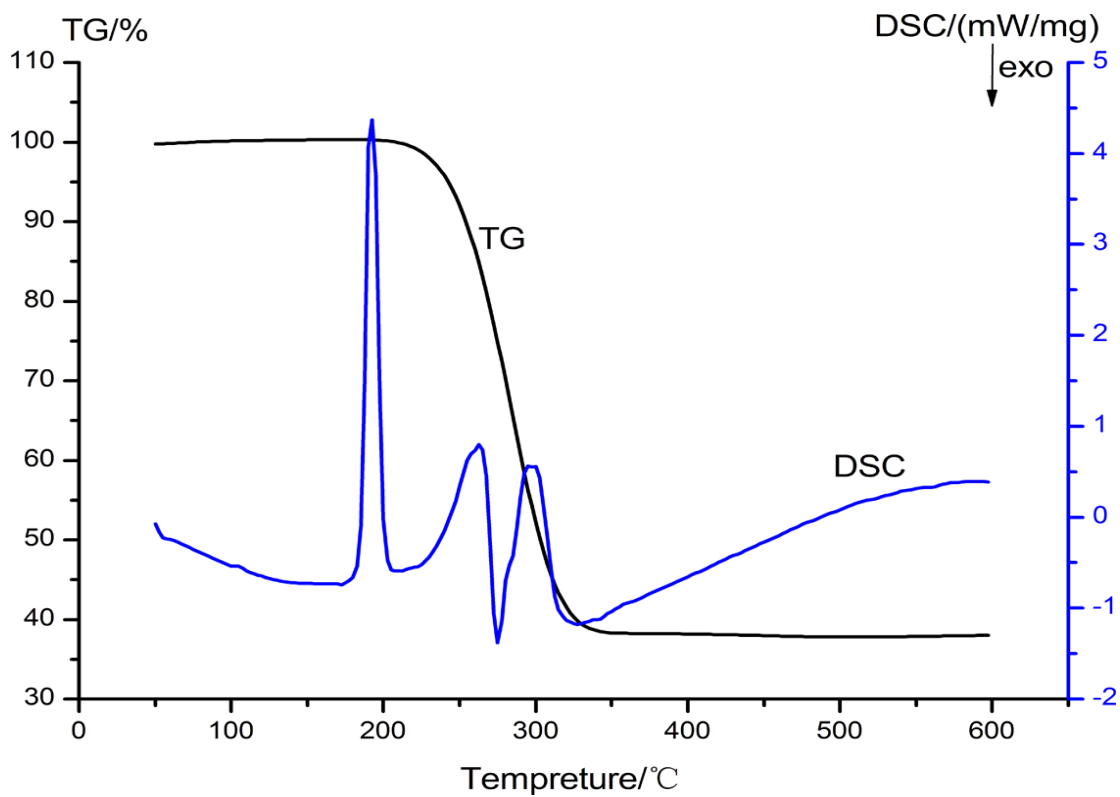

(b) The TG-DSC curves of compound **2**

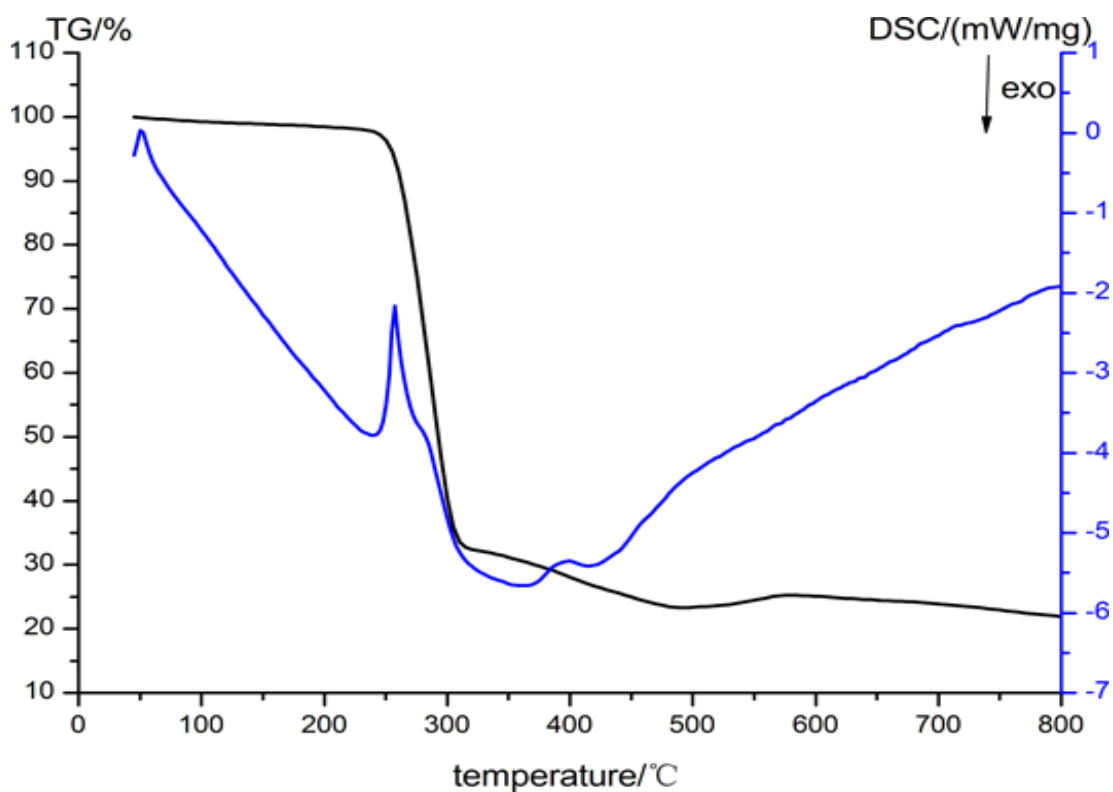

(c) The TG-DSC curves of compound 3

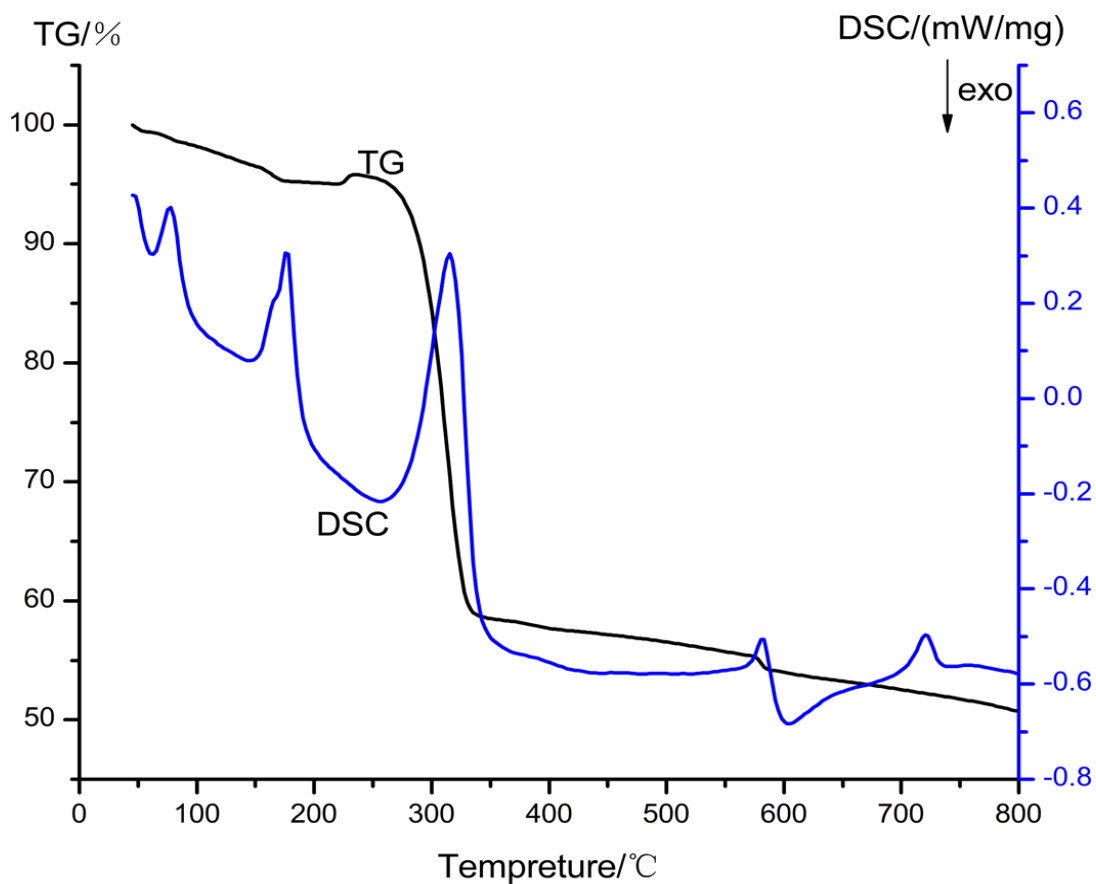

(d) The TG-DSC curves of compound 4

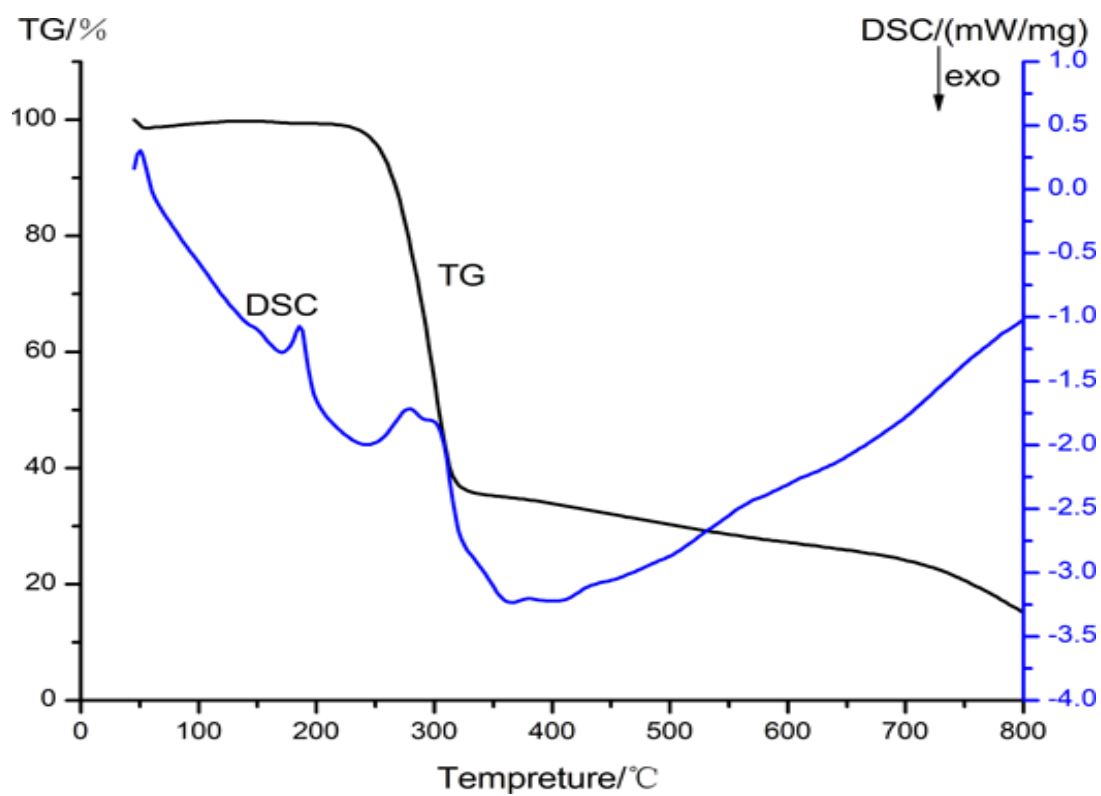

(e) The TG-DSC curves of compound 5

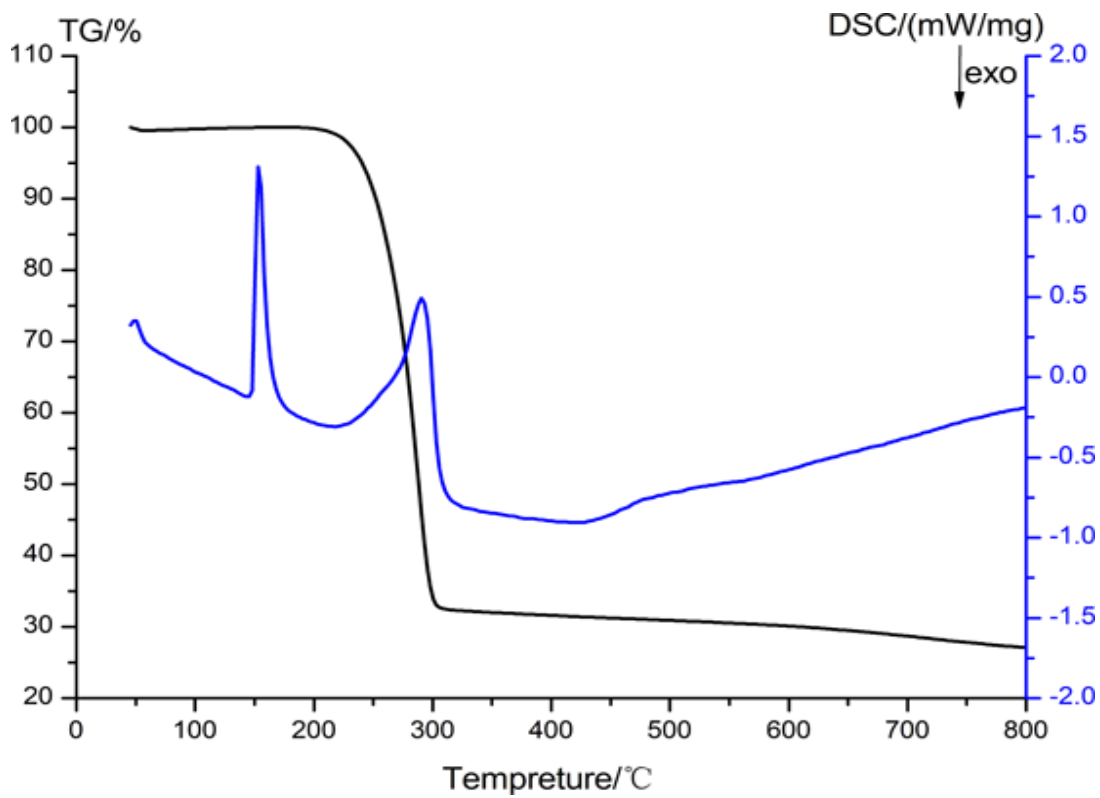

(f) The TG-DSC curves of compound 6



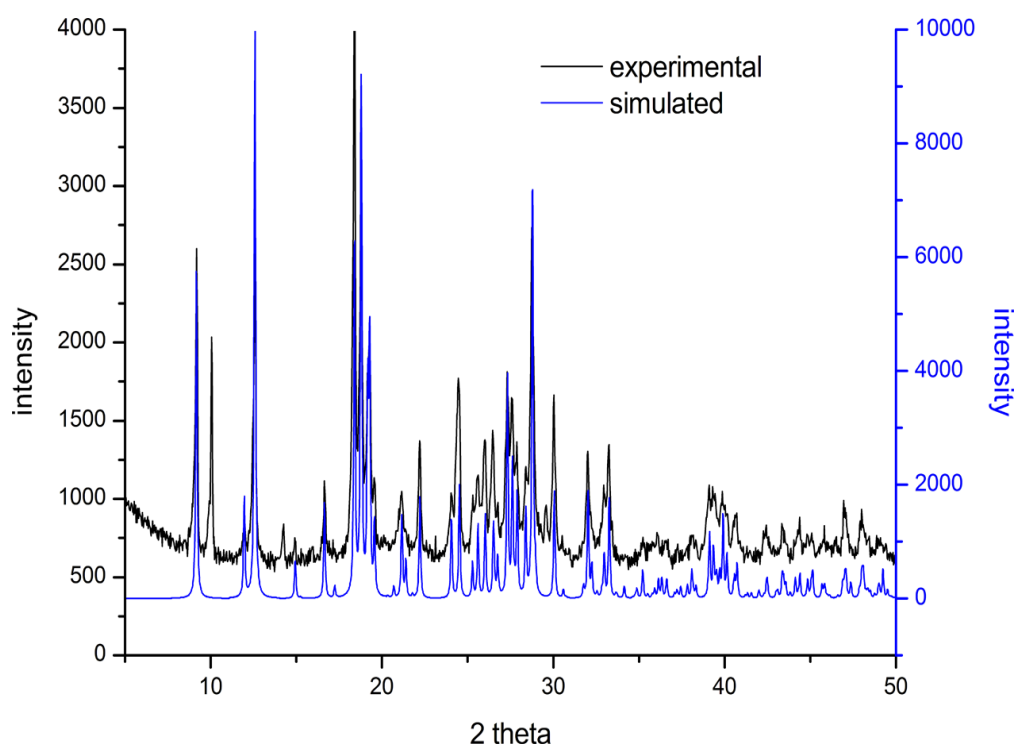

**Fig. S5** Simulated and experimental PXRD pattern of compound **1**.

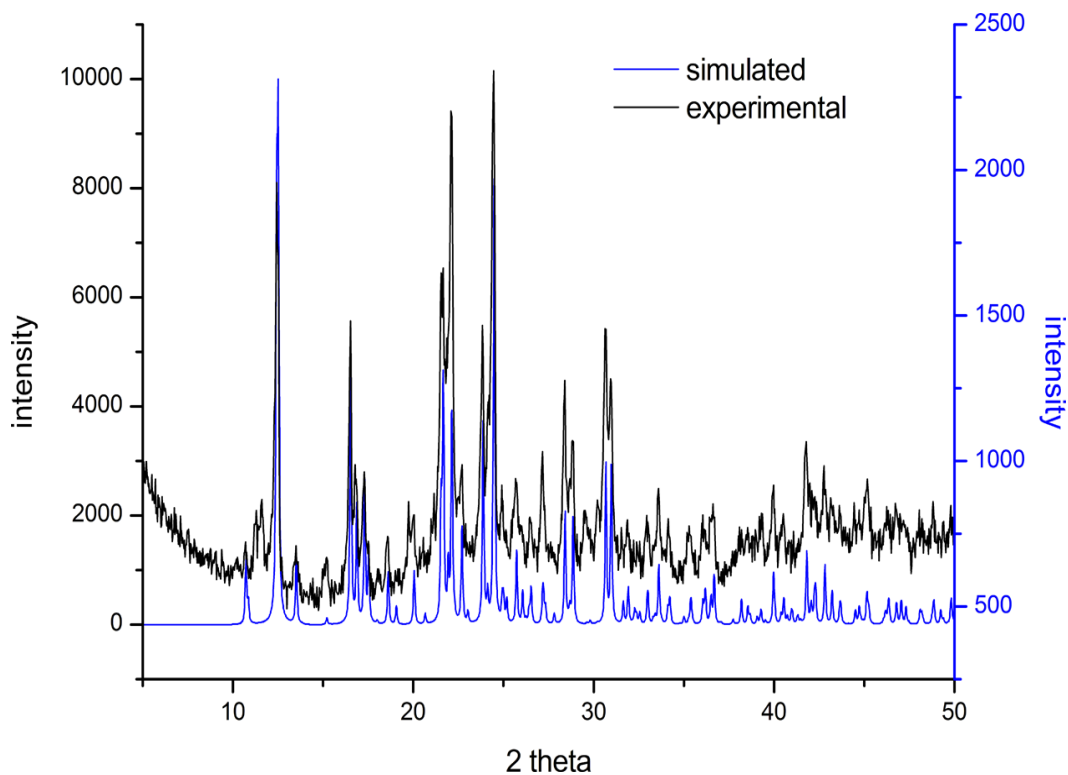

**Fig. S6** Simulated and experimental PXRD pattern of compound **2**.

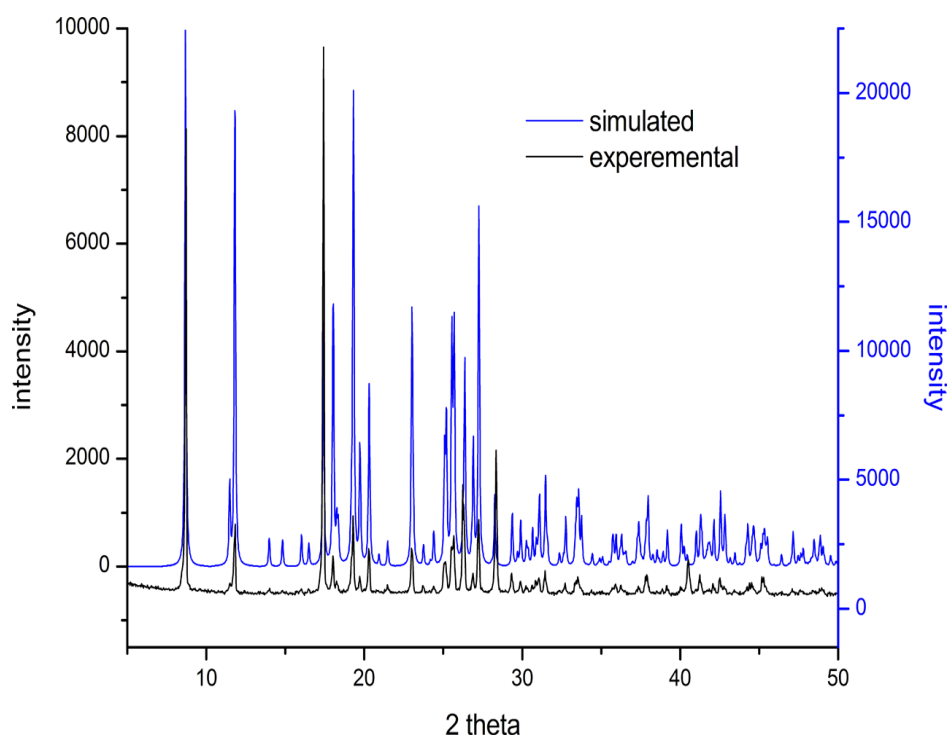

**Fig. S7** Simulated and experimental PXRD pattern of compound **3**.

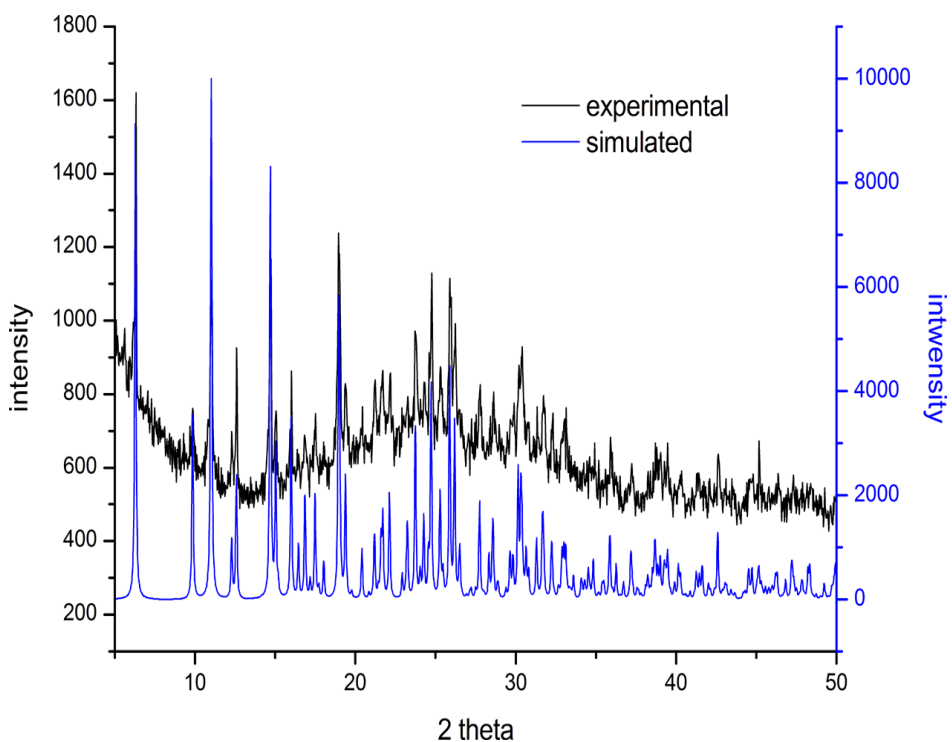

**Fig. S8** Simulated and experimental PXRD pattern of compound **4**.

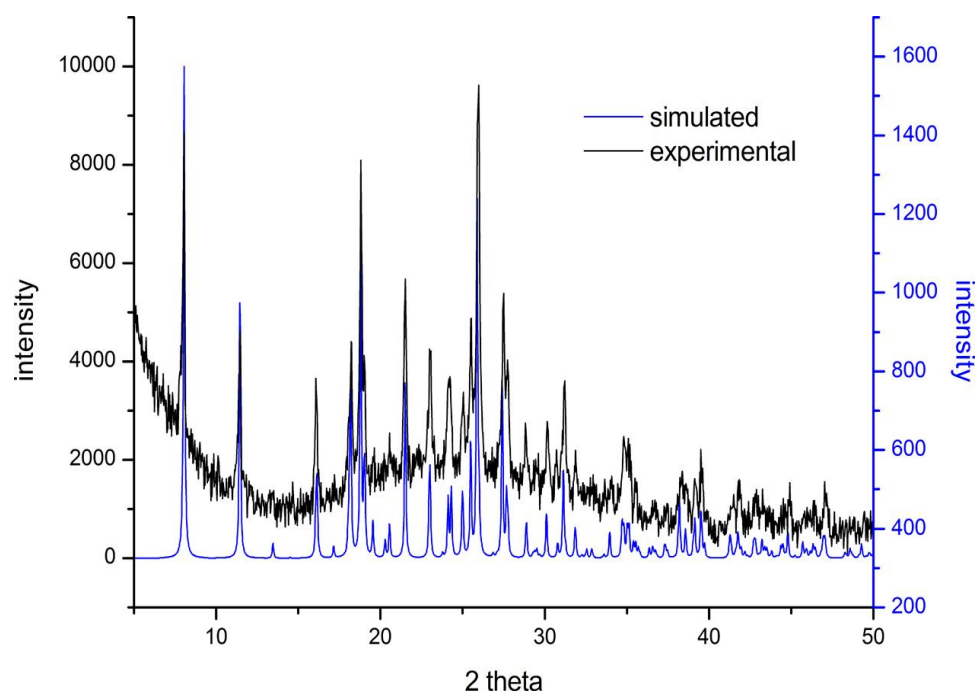

**Fig. S9** Simulated and experimental PXRD pattern of compound **5**.

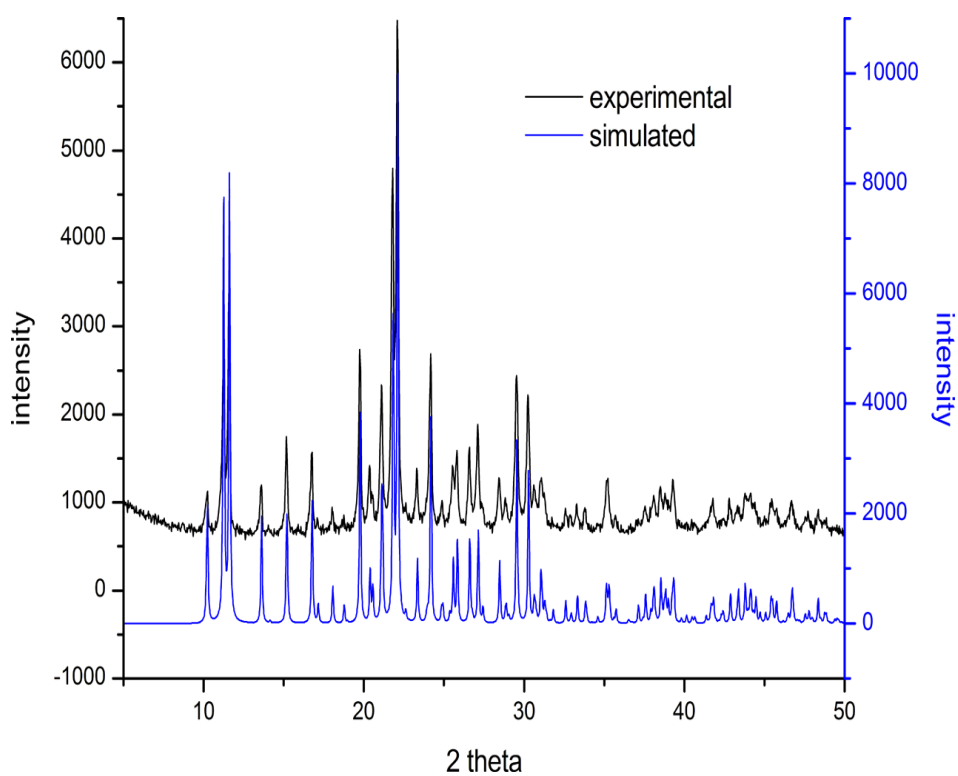

**Fig. S10** Simulated and experimental PXRD pattern of compound **6**
